# Supplementary material
Source: Springer Nature journal article supplement (https://www.springermedizin.de/resource/supplementary/12985_2009_760_MOESM5_ESM.pdf/9608684)

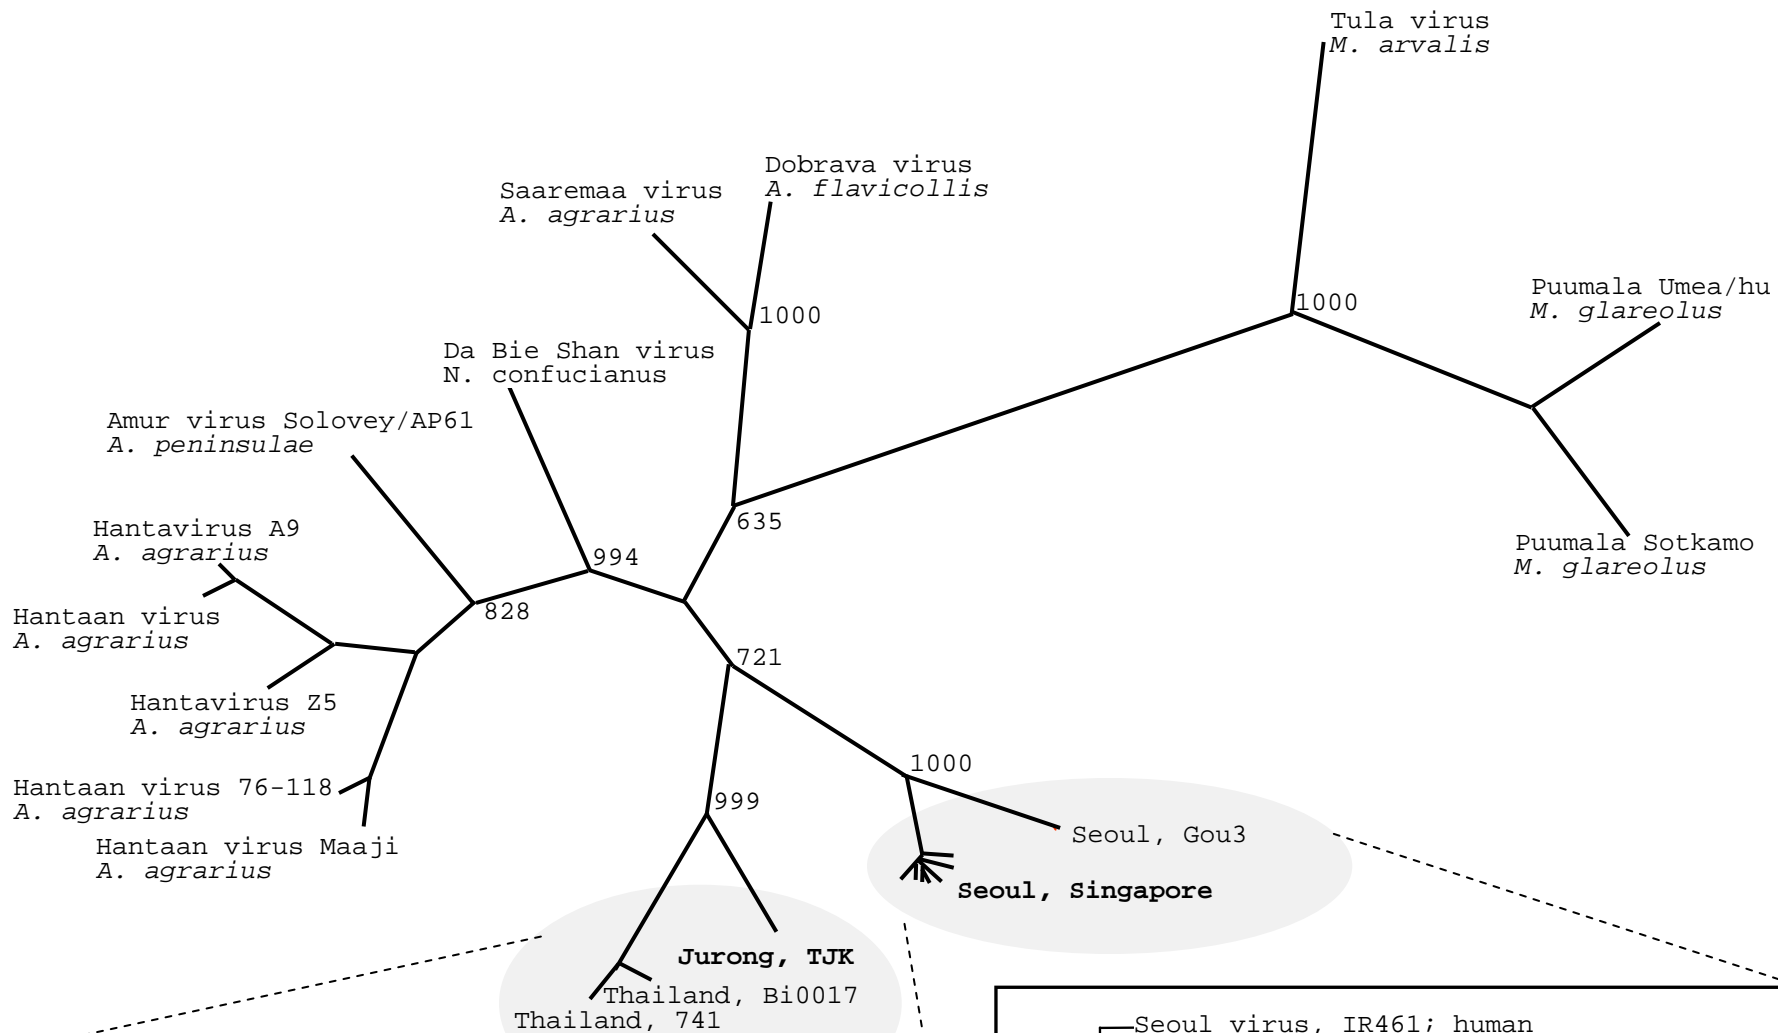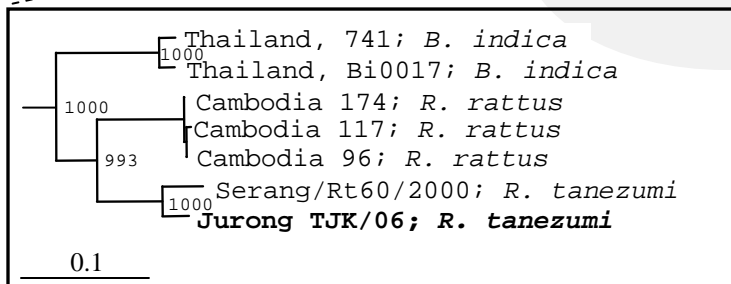

0.1

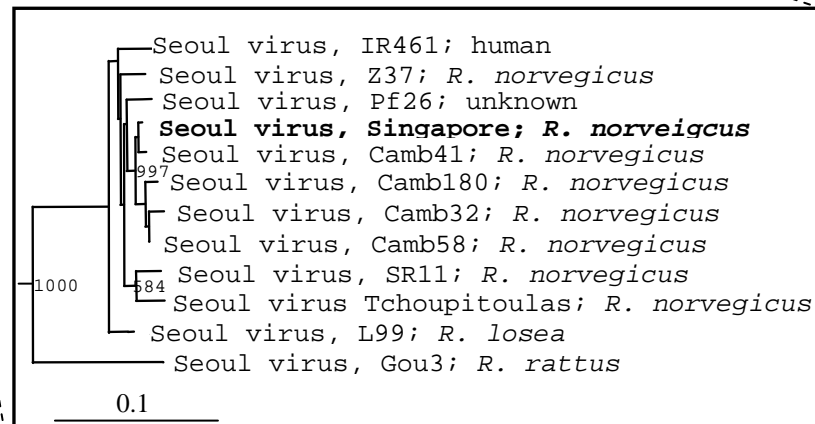

0.1

Supplement: MOESM5 [file 9608684]
